# Supplementary material
Source: ML conference proceedings conference paper supplement (https://openreview.net/forum?id=4i23Bjlh4Y9)
Supplement: supplementary_material [file attachment]

# 567 Appendices

## 568 A Experiment Details

### 569 A.1 Architectures and Hyperparameters

570 In Section 4, MLP has one hidden layer with 512 hidden units, and AlexNet has five convolution  
 571 layers (conv.  $3 \times 3$  (64 filters)  $\rightarrow$  max-pool  $3 \times 3 \rightarrow$  conv.  $5 \times 5$  (192 filters)  $\rightarrow$  max-pool  $3 \times 3 \rightarrow$   
 572 conv.  $3 \times 3$  (384 filters)  $\rightarrow$  conv.  $3 \times 3$  (256 filters)  $\rightarrow$  conv.  $3 \times 3$  (256 filters)  $\rightarrow$  max-pool  
 573  $3 \times 3$ ) followed by two fully connected layers both with 4096 units and a 10-way linear layer as the  
 574 output layer. All of the convolution layers and the fully connected layers use standard rectified linear  
 575 activation functions (ReLU).

576 The fixed learning rates used for MLP and AlexNet are 0.01 and 0.001, respectively. The batch size  
 577 is set to 60. For the corrupted label experiment, we train the models until the models achieve 100%  
 578 training accuracy. For other cases, we train the neural networks until the training loss converges  
 579 (e.g.,  $< 0.0001$ ). Other settings are either described in Section 4 or apparent in the figures. Standard  
 580 techniques such as weight decay and batch normalization are not used.

581 In Section 5, we compare GMP with other advanced regularization methods. The results of other  
 582 methods are reported directly from [83], and we now give their hyperparameter settings here for  
 583 completeness. For Dropout, 10% of neurons are randomly selected to be deactivated in each layer.  
 584 For label smoothing, the coefficient is 0.2. For flooding, the level is set to 0.02. For MixUp, we  
 585 lineally combine random pairs of training data where the coefficient is drawn from Beta(1, 1).  
 586 For adversarial training, the perturbation size is 1 for each pixel and we take one step to generate  
 587 adversarial examples. For AMP, the number of inner iteration is 1, and the  $L_2$  norm ball radius values  
 588 are 0.5 for PreActResNet18 and 0.1 for VGG16, respectively.

### 589 A.2 Algorithm of Dynamic Gradient Clipping

590 The dynamic gradient clipping algorithm is described in Algorithm 1. For both MLP and AlexNet,  
 591 we let  $\alpha = 0.1$ . The start step for clipping,  $T_c$ , is also an important hyperparameter. However, it can  
 592 be removed by detecting the evolution of the average gradient norm for each epoch. Specifically,  
 593 whenever the average gradient norm of epoch  $j$  is larger than the average gradient norm of epoch  
 594  $j - 1$ , the clipping operation begins.

---

#### Algorithm 1 Dynamic Gradient Clipping

---

**Require:** Training set  $S$ , Batch size  $b$ , Loss function  $\ell$ , Initial model parameter  $w_0$ , Learning rate  $\lambda$ ,  
 Initial minimum gradient norm  $\mathcal{G}$ , Number of iterations  $T$ , Clipping parameter  $\alpha$ , Clipping step  
 $T_c$

```

1: for  $t \leftarrow 1$  to  $T$  do
2:   Sample  $\mathcal{B} = \{z_i\}_{i=1}^b$  from training set  $S$ 
3:   Compute gradient:
      $g_{\mathcal{B}} \leftarrow \sum_{i=1}^b \nabla_w \ell(w_{t-1}, z_i) / b$ 
4:   if  $t > T_c$  then
5:     if  $\|g_{\mathcal{B}}\|_2 > \mathcal{G}$  then
6:        $g_{\mathcal{B}} \leftarrow \alpha \cdot \mathcal{G} \cdot g_{\mathcal{B}} / \|g_{\mathcal{B}}\|_2$ 
7:     else
8:        $\mathcal{G} \leftarrow \|g_{\mathcal{B}}\|_2$ 
9:     end if
10:  end if
11:  Update parameter:  $w_t \leftarrow w_{t-1} - \lambda \cdot g_{\mathcal{B}}$ 
12: end for
```

---

595 From Figure 4 we can see that dynamic gradient clipping effectively alleviates overfitting by conspic-  
 596 uously slowing down the transition of training to the memorization regime, without changing the  
 597 convergence speed of testing accuracy. Unfortunately, the current design of the dynamic gradient  
 598 clipping algorithm does not provide a significant improvement for models trained on a true dataset.

| PreActResNet18           | Top-1 Acc. (%) | PreActResNet18           | Top-1 Acc. (%) | PreActResNet18           | Top-1 Acc. (%) |
|--------------------------|----------------|--------------------------|----------------|--------------------------|----------------|
| <b>GMP</b> <sup>3</sup>  | 97.43±0.037    | <b>GMP</b> <sup>3</sup>  | 95.64±0.053    | <b>GMP</b> <sup>3</sup>  | 78.05±0.208    |
| <b>GMP</b> <sup>5</sup>  | 97.40±0.043    | <b>GMP</b> <sup>5</sup>  | 95.63±0.073    | <b>GMP</b> <sup>5</sup>  | 77.93±0.188    |
| <b>GMP</b> <sup>10</sup> | 97.34±0.058    | <b>GMP</b> <sup>10</sup> | 95.71±0.073    | <b>GMP</b> <sup>10</sup> | 78.07±0.170    |
| VGG16                    | Top-1 Acc. (%) | VGG16                    | Top-1 Acc. (%) | VGG16                    | Top-1 Acc. (%) |
| <b>GMP</b> <sup>3</sup>  | 97.18±0.057    | <b>GMP</b> <sup>3</sup>  | 94.33±0.094    | <b>GMP</b> <sup>3</sup>  | 74.45±0.256    |
| <b>GMP</b> <sup>5</sup>  | 97.17±0.072    | <b>GMP</b> <sup>5</sup>  | 94.49±0.118    | <b>GMP</b> <sup>5</sup>  | 74.91±0.389    |
| <b>GMP</b> <sup>10</sup> | 97.09±0.068    | <b>GMP</b> <sup>10</sup> | 94.45±0.158    | <b>GMP</b> <sup>10</sup> | 75.09±0.285    |
| (a) SVHN                 |                | (b) CIFAR-10             |                | (c) CIFAR-100            |                |

Table 2: Top-1 classification accuracy on (a) SVHN, (b) CIFAR-10 and (c) CIFAR-100. Superscript denotes the number of sampled Gaussian noises during training.

599 Designing better regularization algorithms may require understanding the epoch-wise double descent  
600 curve of gradient dispersion where the model is trained on a true dataset.

### 601 A.3 Discussion on Gradient Dispersion of Models trained on True Dataset

602 In the case of no noise injected, Figure 3a shows that the model with good generalization property  
603 has a exponentially-decaying gradient dispersion. This is consistent with our discussion of Lemma 5  
604 in Section 3, that is, small  $I(G_t + N_t; Z_i | \tilde{W}_{t-1})$  indicates good generalization. Notably, gradient  
605 dispersion of AlexNet trained on the true CIFAR10 data still has a epoch-wise double descent curve.  
606 The difference between Figure 3e with Figure 3f-3h is that the testing accuracy does not decrease  
607 in the second phase/memorization regime for AlexNet trained on the true CIFAR10 data. Loosely  
608 speaking, we conjecture that memorizing random labels will hurt the performance on unseen true data  
609 but memorizing true labels will not. This explains why dynamic gradient clipping or preventing the  
610 training entering the memorization regime cannot improve the performance on a true dataset.

### 611 A.4 Algorithm of Gaussian Model Perturbation

---

#### Algorithm 2 Gaussian Model Perturbation Training

---

**Require:** Training set  $S$ , Batch size  $b$ , Loss function  $\ell$ , Initial model parameter  $w_0$ , Learning rate  $\lambda$ ,  
Number of noise  $k$ , Standard deviation of Gaussian distribution  $\sigma$ , Lagrange multiplier  $\rho$   
**while**  $w_t$  not converged **do**  
  2: Update iteration:  $t \leftarrow t + 1$   
  Sample  $\mathcal{B} = \{z_i\}_{i=1}^b$  from training set  $S$   
  4: Sample  $\Delta_j \sim \mathcal{N}(0, \sigma^2)$  for  $j \in [k]$   
  Compute gradient:  

$$g_{\mathcal{B}} \leftarrow \sum_{i=1}^b \left( \nabla_w \ell(w_t, z_i) + \rho \sum_{j=1}^k (\nabla_w \ell(w_t + \Delta_j, z_i) - \nabla_w \ell(w_t, z_i)) / k \right) / b$$
  
  6: Update parameter:  $w_{t+1} \leftarrow w_t - \lambda \cdot g_{\mathcal{B}}$   
**end while**

---

612 The GMP algorithm is given in Algorithm 2. Table 1 shows that our method is competitive to the  
613 state-of-the-art regularization techniques. Specifically, our method achieves the best performance  
614 on SVHN for both models and on CIFAR-100 where VGG16 is employed. Particularly, testing  
615 accuracy is improved by nearly 2% on the CIFAR-100 dataset with VGG16. For other tasks, GMP is  
616 always able to achieve the top-3 performance. From Table 2, we find that increasing the number of  
617 sampled noises does not guarantee the improvement of testing accuracy and may even degrade the  
618 performance on some datasets (e.g., SVHN). This hints that we can use small number of noises to  
619 reduce the running time without losing performance. Moreover, we observe that **GMP with  $k = 3$**   
620 **usually takes around  $1.76 \times$  that of ERM training time**, which is affordable.

621 One potential extension of GMP is letting the variance of the noise distribution be a function of the  
622 iteration step  $t$ . In other words, using the time-dependent  $\sigma_t$  instead of a constant  $\sigma$ .

## 623 A.5 License of the Assets

624 MNIST is made available under the terms of the Creative Commons Attribution-Share Alike 3.0  
 625 license. CIFAR10/CIFAR100 is licensed under the MIT License. SVHN is licensed under the  
 626 GNU General Public License v3.0. Two open source packages used in this paper, BackPACK and  
 627 PyHessian, are licensed under the MIT License.

## 628 B Proofs for Section 3

### 629 B.1 Proof of Lemma 4

630 *Proof.* The proof given here is a simple extension of the proof of [60, Lemma 3.4.2], which is a  
 631 special instance of the (weak) HWI inequality.

$$\mathrm{D}_{\mathrm{KL}}(P_{X+\sqrt{t}N}||P_{Y+\sqrt{t}N}) \leq \mathrm{D}_{\mathrm{KL}}(P_{X,Y,X+\sqrt{t}N}||P_{X,Y,Y+\sqrt{t}N}) \quad (1)$$

$$= \mathbb{E}_{X,Y} \left[ \mathrm{D}_{\mathrm{KL}}(P_{X+\sqrt{t}N|X,Y}||P_{Y+\sqrt{t}N|X,Y}) \right] \quad (2)$$

$$= \mathbb{E}_{X,Y} \left[ \mathrm{D}_{\mathrm{KL}}(\mathcal{N}(X, t)||\mathcal{N}(Y, t))|X, Y \right] \quad (3)$$

$$= \frac{1}{2t} \mathbb{E}_{X,Y} [||X - Y||^2], \quad (4)$$

632 where Eq.1 is by the chain rule of the KL divergence, Eq.3 holds since  $N$  is independent of  $(X, Y)$   
 633 and Eq.4 is a special case of the equality

$$\mathcal{N}(\mu_1, \Sigma_1)||\mathcal{N}(\mu_2, \Sigma_2)) = \frac{1}{2} \left[ \log \frac{|\Sigma_2|}{|\Sigma_1|} - d + \mathrm{Tr}(\Sigma_2^{-1}\Sigma_1) + (\mu_2 - \mu_1)^T \Sigma_2^{-1}(\mu_2 - \mu_1) \right].$$

634 Eq.4 holds for any joint distribution of  $(X, Y)$ , so by the definition of Wasserstein distance, we have

$$\mathrm{D}_{\mathrm{KL}}(P_{X+\sqrt{t}N}||P_{Y+\sqrt{t}N}) \leq \frac{1}{2t} \mathbb{W}_2^2(P_X, P_Y). \quad (5)$$

635 This completes the proof.  $\square$

### 636 B.2 Proof of Theorem 1

637 *Proof.* The main parts of the proof follow directly from [49]. We first bound the mutual information  
 638  $I(\widetilde{W}_T; S)$ ,

$$I(\widetilde{W}_T; S) = \int_s \int_w dP_{\widetilde{W}_T|S=s}(w) \log \frac{dP_{\widetilde{W}_T|S=s}(w)}{dP_{\widetilde{W}_T}(w)} d\nu(s) \quad (6)$$

$$= \int_s \int_w dP_{\widetilde{W}_T|S=s}(w) \log \frac{dP_{\widetilde{W}_T|S=s}(w)}{\int_{s'} dP_{\widetilde{W}_T|S'=s'}(w) d\nu(s')} d\nu(s) \quad (7)$$

$$\leq \int_{s,s'} \int_w dP_{\widetilde{W}_T|S=s}(w) \log \frac{dP_{\widetilde{W}_T|S=s}(w)}{dP_{\widetilde{W}_T|S'=s'}(w)} d\nu(s) d\nu(s') \quad (8)$$

$$= \mathbb{E}_{S,S'} \left[ \mathrm{D}_{\mathrm{KL}} \left( P_{\widetilde{W}_T|S=s} || P_{\widetilde{W}_T|S'=s'} \right) \middle| S = s, S' = s' \right] \quad (9)$$

$$\leq \mathbb{E}_{S,S'} \left[ \mathrm{D}_{\mathrm{KL}} \left( P_{\widetilde{W}_1, \widetilde{W}_2, \dots, \widetilde{W}_T|S=s} || P_{\widetilde{W}_1, \widetilde{W}_2, \dots, \widetilde{W}_T|S'=s'} \right) \middle| S = s, S' = s' \right] \quad (10)$$

$$= \sum_{t=1}^T \mathbb{E}_{S,S',\widetilde{W}_{t-1}} \left[ \mathrm{D}_{\mathrm{KL}} \left( P_{\widetilde{W}_t|\widetilde{W}_{t-1}=\widetilde{w}_{t-1},S=s} || P_{\widetilde{W}_t|\widetilde{W}_{t-1}=\widetilde{w}_{t-1},S'=s'} \right) \middle| \widetilde{W}_{t-1} = \widetilde{w}_{t-1}, S = s, S' = s' \right], \quad (11)$$

639 where Eq.8 is by Jensen's inequality, Eq.10 is by the data-processing inequality of the KL divergence  
 640 and Eq.11 is by the chain rule of the KL divergence. The main difference between the above process  
 641 and [49] is that we don't need to use an independent copy  $\widetilde{W}'_T$  of  $\widetilde{W}_T$  in Eq.6.

642 Now apply Lemma 4, we have

$$\begin{aligned} & D_{\text{KL}} \left( P_{\widetilde{W}_t | \widetilde{W}_{t-1} = \widetilde{w}_{t-1}, S=s} \parallel P_{\widetilde{W}_t | \widetilde{W}_{t-1} = \widetilde{w}_{t-1}, S'=s'} \right) \\ &= D_{\text{KL}} \left( P_{g(\widetilde{w}_{t-1} - \Delta_{t-1}, B_t) - \frac{N_t}{\lambda_t} | \widetilde{W}_{t-1} = \widetilde{w}_{t-1}, S=s} \parallel P_{g(\widetilde{w}_{t-1} - \Delta_{t-1}, B'_t) - \frac{N_t}{\lambda_t} | \widetilde{W}_{t-1} = \widetilde{w}_{t-1}, S'=s'} \right) \end{aligned} \quad (12)$$

$$\leq \frac{\lambda_t^2}{2\sigma_t^2} \mathbb{E} [\|g(\widetilde{w}_{t-1} - \Delta_{t-1}, B_t) - g(\widetilde{w}_{t-1} - \Delta_{t-1}, B'_t)\|_2^2]. \quad (13)$$

643 Since each instance is independently sampled during training, we have

$$\mathbb{E} [\|g(w_{t-1}, B_t) - g(w_{t-1}, B'_t)\|_2^2] = 2\mathbb{E} [\|g(w_{t-1}, B_t) - \mathbb{E}[g(w_{t-1}, B_t)]\|_2^2] \quad (14)$$

$$= \frac{2}{b} \mathbb{E} [\|\nabla_w \ell(w_{t-1}, Z) - \mathbb{E}[\nabla_w \ell(w_{t-1}, Z)]\|_2^2]. \quad (15)$$

644 Plugging Eq.13 and Eq.15 into Eq.11,

$$I(\widetilde{W}_T; S) \leq \sum_{t=1}^T \sum_{S, S', W_{t-1}} \mathbb{E} \left[ \frac{\lambda_t^2}{2\sigma_t^2} \|g(W_{t-1}, B_t) - g(W_{t-1}, B'_t)\|_2^2 \right] \quad (16)$$

$$= \sum_{t=1}^T \sum_{Z, W_{t-1}} \mathbb{E} \left[ \frac{\lambda_t^2}{b\sigma_t^2} \|\nabla_w \ell(W_{t-1}, Z) - \mathbb{E}_Z[\nabla_w \ell(W_{t-1}, Z)]\|_2^2 \right] \quad (17)$$

$$= \sum_{t=1}^T \frac{\lambda_t^2}{b\sigma_t^2} \mathbb{E}_{W_{t-1}} [\mathbb{V}(W_{t-1})]. \quad (18)$$

645 Thus,

$$|\text{gen}(\mu, P_{W_T|S})| = \left| \text{gen}(\mu, P_{\widetilde{W}_T|S}) + \mathbb{E}_{W_T, \Delta_T} [L_\mu(W_T) - L_\mu(\widetilde{W}_T)] + \mathbb{E}_{W_T, \Delta_T, S} [L_S(\widetilde{W}_T) - L_S(W_T)] \right| \quad (19)$$

$$\leq \sqrt{\frac{2R^2 I(\widetilde{W}_T; S)}{n}} + \left| \mathbb{E}_{W_T, S, S'} [\gamma(W_T, S) - \gamma(W_T, S')] \right| \quad (20)$$

$$\leq \sqrt{\frac{2R^2}{nb} \sum_{t=1}^T \frac{\lambda_t^2}{\sigma_t^2} \mathbb{E}_{W_{t-1}} [\mathbb{V}(W_{t-1})]} + \left| \mathbb{E}_{W_T, S, S'} [\gamma(W_T, S) - \gamma(W_T, S')] \right|, \quad (21)$$

646 where Eq.20 is by Lemma 1 and the triangle inequality. This completes the proof.  $\square$

### 647 B.3 Proof of Lemma 5

648 *Proof.* Let  $Z_i$  be used in  $t^{\text{th}}$  step, the LHS of the inequality can be rewritten as

$$\begin{aligned} & I \left( -g(W_{t-1}, B_t) + \frac{1}{\lambda_t} N_t; Z_i | \widetilde{W}_{t-1} \right) \\ &= \mathbb{E}_{\widetilde{W}_{t-1}, Z_i} \left[ D_{\text{KL}} \left( P_{-g(W_{t-1}, B_t) + \frac{N_t}{\lambda_t} | Z_i = z, \widetilde{W}_{t-1} = \widetilde{w}_{t-1}} \parallel P_{-g(W_{t-1}, B_t) + \frac{N_t}{\lambda_t} | \widetilde{W}_{t-1} = \widetilde{w}_{t-1}} \right) \right]. \end{aligned} \quad (22)$$

649 By Lemma 4, we have

$$\begin{aligned} & D_{\text{KL}} \left( P_{-g(W_{t-1}, B_t) + \frac{N_t}{\lambda_t} | Z_i = z, \widetilde{W}_{t-1} = \widetilde{w}_{t-1}} \parallel P_{-g(W_{t-1}, B_t) + \frac{N_t}{\lambda_t} | \widetilde{W}_{t-1} = \widetilde{w}_{t-1}} \right) \\ & \leq \frac{\lambda_t^2}{2\sigma_t^2} \mathbb{W}_2^2 \left( P_{-g(W_{t-1}, B_t) | Z_i = z, \widetilde{W}_{t-1} = \widetilde{w}_{t-1}}, P_{-g(W_{t-1}, B_t) | \widetilde{W}_{t-1} = \widetilde{w}_{t-1}} \right). \end{aligned} \quad (23)$$

Let  $Z'_i$  be an independent copy of  $Z_i$  such that  $(W_{t-1}, Z'_i, Z_i) \sim P_{W_{t-1}} \otimes P_{Z_i|W_{t-1}} \otimes P_{Z'_i|W_{t-1}}$ .  
 We now consider a special coupling: define two random vectors  $\tilde{G}_t^z$  and  $\tilde{G}_t$  as follows,

$$\tilde{G}_t^z \triangleq -\frac{1}{b} \left( \sum_{Z_j \in B_t \setminus \{Z_i\}} \nabla_w \ell(\tilde{w}_{t-1} - \Delta_{t-1}, Z_j) + \nabla_w \ell(\tilde{w}_{t-1} - \Delta_{t-1}, z) \right), \quad (24)$$

$$\tilde{G}_t \triangleq -\frac{1}{b} \left( \sum_{Z_j \in B_t} \nabla_w \ell(\tilde{w}_{t-1} - \Delta_{t-1}, Z_j) \right). \quad (25)$$

Thus,  $\tilde{G}_t^z$  and  $\tilde{G}_t$  have marginals  $P_{-g(W_{t-1}, B_t)|Z_i=z, \tilde{W}_{t-1}=\tilde{w}_{t-1}}$  and  $P_{-g(W_{t-1}, B_t)|\tilde{W}_{t-1}=\tilde{w}_{t-1}}$ , respectively. Combining Eq.22, Eq.23 and the definition of Wasserstein distance, we have

$$I\left(-g(W_{t-1}, B_t) + \frac{N_t}{\lambda_t}; Z_i | \tilde{W}_{t-1}\right) \leq \frac{\lambda_t^2}{2\sigma_t^2} \mathbb{E}_{\tilde{W}_{t-1}, Z_i, \Delta_{t-1}, Z'_i} \left[ \|\tilde{G}_t^z - \tilde{G}_t\|_2^2 \right] \quad (26)$$

$$= \frac{\lambda_t^2}{2\sigma_t^2} \mathbb{E}_{W_{t-1}, Z_i, Z'_i} \left[ \frac{1}{b^2} \|\nabla_w \ell(W_{t-1}, Z_i) - \nabla_w \ell(W_{t-1}, Z'_i)\|_2^2 \right] \quad (27)$$

$$= \frac{\lambda_t^2}{\sigma_t^2 b^2} \mathbb{E}_{W_{t-1}} [\mathbb{V}(W_{t-1})], \quad (28)$$

where Eq.28 is by

$$\mathbb{E}_{Z_i, Z'_i} [\|\nabla_w \ell(w_{t-1}, Z_i) - \nabla_w \ell(w_{t-1}, Z'_i)\|_2^2] = 2\mathbb{V}(w_{t-1}).$$

This completes the proof.  $\square$

#### B.4 Proof of Theorem 2

Since  $\eta_{i,\tau} \leq 1$  for every  $i$  and  $\tau$  in Theorem 3, Theorem 2 follows directly from Theorem 3.

Or alternatively, using the following proof.

*Proof.* Given a specific sample path, let the step  $t_K$  be the last iteration that  $Z_i$  is used (e.g., see Figure 5). By using the data processing inequality, we can easily have

$$I(\tilde{W}_T; Z_i) \leq I(\tilde{W}_{t_K}; Z_i). \quad (29)$$

Then notice that

$$I(\tilde{W}_{t_K}; Z_i) = I(\tilde{W}_{t_K-1} + G_{t_K} + N_{t_K}; Z_i) \quad (30)$$

$$\leq I(\tilde{W}_{t_K-1}, G_{t_K} + N_{t_K}; Z_i) \quad (31)$$

$$= I(\tilde{W}_{t_K-1}; Z_i) + I\left(-g(W_{t_K-1}, B_{t_K}) + \frac{1}{\lambda_{t_K}} N_{t_K}; Z_i | \tilde{W}_{t_K-1}\right), \quad (32)$$

where  $G_{t_K} = -\lambda_{t_K} g(W_{t_K-1}, B_{t_K})$ , Eq.31 is by  $I(f(X); Y) \leq I(X; Y)$  and Eq.32 is by the chain rule of mutual information. The second term in Eq.32 can be upper bounded by using Lemma 5. The first term can be upper bounded by following the similar procedure recursively, namely, Eq.29-32. Let  $t_1$  be the first time that  $Z_i$  is used in training. Given the fact that  $Z_i$  is independent of  $\tilde{W}_t$  when  $t < t_1$ , it's easy to see

$$I(\tilde{W}_T; Z_i) \leq \sum_{t \in \mathcal{T}_i} \frac{\lambda_t^2}{\sigma_t^2 b^2} \mathbb{E}_{W_{t-1}} [\mathbb{V}(W_{t-1})], \quad (33)$$

where  $\mathcal{T}_i$  is the set of all indices of iterations that contain  $Z_i$ .

668 Thus, the following bound holds,

$$|\text{gen}(\mu, P_{W_T|S})| = \left| \text{gen}(\mu, P_{\widetilde{W}_T|S}) + \mathbb{E}_{W_T, \Delta_T} [L_\mu(W_T) - L_\mu(\widetilde{W}_T)] + \mathbb{E}_{W_T, \Delta_T, S} [L_S(\widetilde{W}_T) - L_S(W_T)] \right|$$

$$\leq \frac{1}{n} \sum_{i=1}^n \sqrt{2R^2 I(W; Z_i)} + \left| \mathbb{E}_{W_T, S, S'} [\gamma(W_T, S) - \gamma(W_T, S')] \right| \quad (34)$$

$$\leq \frac{R}{nb} \sum_{i=1}^n \sqrt{\sum_{t \in \mathcal{I}_i} \frac{2\lambda_t^2}{\sigma_t^2} \mathbb{E}_{W_{t-1}} [\mathbb{V}(W_{t-1})]} + \left| \mathbb{E}_{W_T, S, S'} [\gamma(W_T, S) - \gamma(W_T, S')] \right|, \quad (35)$$

669 where Eq.34 is by Lemma 2 and the triangle inequality. This concludes the proof.  $\square$

## 670 B.5 Proof of Corollary 1

671 *Proof.* To handle the mismatch between the outputs of perturbed SGD and SGD, we apply Taylor  
672 expansion around  $\Delta_T = \vec{0}$ ,

$$\mathbb{E}_{W_T, S, \Delta_T} [L_S(W_T + \Delta_T) - L_S(W_T)] = \frac{1}{n} \sum_{i=1}^n \mathbb{E}_{W_T, Z_i, \Delta_T} [\ell(W_T + \Delta_T, Z_i) - \ell(W_T, Z_i)] \quad (36)$$

$$\approx \mathbb{E}_{W_T, Z, \Delta_T} \left[ \langle \nabla_w \ell(W_T, Z), \Delta_T \rangle + \frac{1}{2} \Delta_T^T \mathbf{H}_{W_T}(Z) \Delta_T \right] \quad (37)$$

$$= \mathbb{E}_{W_T, Z, \Delta_T} \left[ \frac{1}{2} \Delta_T^T \mathbf{H}_{W_T}(Z) \Delta_T \right] \quad (38)$$

$$= \frac{1}{2} \langle \mathbb{E}_{W_T, Z} [\mathbf{H}_{W_T}(Z)], \mathbb{E}_{\Delta_T} [\Delta_T \Delta_T^T] \rangle \quad (39)$$

$$= \frac{1}{2} \langle \mathbb{E}_{W_T, Z} [\mathbf{H}_{W_T}(Z)], \text{diag}(\sum_{t=1}^T \sigma_t^2) \rangle \quad (40)$$

$$= \frac{\sum_{t=1}^T \sigma_t^2}{2} \text{Tr}(\mathbb{E}_{W_T, Z} [\mathbf{H}_{W_T}(Z)]), \quad (41)$$

673 where Eq.38 is by the zero mean of the perturbation, Eq.40 is by the independence of the coordinates  
674 of  $\Delta_T$ ,  $\langle \cdot, \cdot \rangle$  denotes the inner product of two matrices,  $\text{diag}(A)$  is the diagonal matrix with element  
675  $A$  and  $\text{Tr}(\cdot)$  is the trace of a matrix.

676 Under the condition  $\mathbb{E}_{W_T, S'} [\gamma(W_T, S')] \geq 0$ , we now bound  $\text{gen}(\mu, P_{\widetilde{W}_T|S})$  instead of its absolute  
677 value,  $|\text{gen}(\mu, P_{\widetilde{W}_T|S})|$ . The following is straightforward,

$$\text{gen}(\mu, P_{\widetilde{W}_T|S}) \leq \frac{R}{nb} \sum_{i=1}^n \sqrt{\sum_{t \in \mathcal{I}_i} \frac{2\lambda_t^2}{\sigma_t^2} \mathbb{E}_{W_{t-1}} [\mathbb{V}(W_{t-1})]} + \mathbb{E}_{W_T, S, S'} [\gamma(W_T, S) - \gamma(W_T, S')] \quad (42)$$

$$\leq \frac{R}{nb} \sum_{i=1}^n \sqrt{\sum_{t \in \mathcal{I}_i} \frac{2\lambda_t^2}{\sigma_t^2} \mathbb{E}_{W_{t-1}} [\mathbb{V}(W_{t-1})]} + \mathbb{E}_{W_T, S} [\gamma(W_T, S)] \quad (43)$$

$$\lesssim \frac{R}{nb} \sum_{i=1}^n \sqrt{\sum_{t \in \mathcal{I}_i} \frac{2\lambda_t^2}{\sigma_t^2} \mathbb{E}_{W_{t-1}} [\mathbb{V}(W_{t-1})]} + \frac{\sum_{t=1}^T \sigma_t^2}{2} \text{Tr}(\mathbb{E}_{W_T, Z} [\mathbf{H}_{W_T}(Z)]). \quad (44)$$

678 This completes the proof.  $\square$

## 679 B.6 Proof of Lemma 6

680 *Proof.* Notice that if each instance is trained only once for every epoch, it's easy to see that  
 681  $\sum_{i=1}^n \sum_{t \in \mathcal{T}_i} = b \sum_{t=1}^T$ . By  $\sqrt{\sum_i x_i} \leq \sum_i \sqrt{x_i}$ , we have

$$\frac{R}{nb} \sum_{i=1}^n \sqrt{\sum_{t \in \mathcal{T}_i} \frac{2\lambda_t^2}{\sigma_t^2} \mathbb{E}_{W_{t-1}} [\mathbb{V}(W_{t-1})]} \leq \frac{R}{n} \sum_{t=1}^T \sqrt{\frac{2\lambda_t^2}{\sigma_t^2} \mathbb{E}_{W_{t-1}} [\mathbb{V}(W_{t-1})]}. \quad (45)$$

682 Or alternatively, square root is a concave function. By Jensen's inequality, we have

$$\frac{R}{nb} \sum_{i=1}^n \sqrt{\sum_{t \in \mathcal{T}_i} \frac{2\lambda_t^2}{\sigma_t^2} \mathbb{E}_{W_{t-1}} [\mathbb{V}(W_{t-1})]} \leq \sqrt{\frac{2R^2}{nb} \sum_{t=1}^T \frac{\lambda_t^2}{\sigma_t^2} \mathbb{E}_{W_{t-1}} [\mathbb{V}(W_{t-1})]}. \quad (46)$$

683 This completes the proof.  $\square$

## 684 B.7 Proof of Corollary 2

685 *Proof.* Recall the smoothness implies  $f(\mathbf{v}) \leq f(\mathbf{w}) + \langle \nabla f(\mathbf{w}), \mathbf{v} - \mathbf{w} \rangle + \frac{\beta}{2} \|\mathbf{v} - \mathbf{w}\|^2$  for all  $\mathbf{v}$  and  
 686  $\mathbf{w}$ . By the triangle inequality, we have

$$|\mathbb{E}[L_\mu(W_T) - L_\mu(W_T + \Delta_T)]| \leq |\mathbb{E}[\langle \nabla_w \ell(W_T, Z), \Delta_T \rangle]| + \frac{\beta}{2} \mathbb{E}[\|\Delta_T\|^2] = \frac{\beta d \sum_{t=1}^T \sigma_t^2}{2} \quad (47)$$

687 Thus, we can see that  $|\mathbb{E}[L_\mu(W_T) - L_\mu(W_T + \Delta_T)]| + |\mathbb{E}[L_S(W_T + \Delta_T) - L_S(W_T)]| \leq$   
 688  $\beta d \sum_{t=1}^T \sigma_t^2$ .  $\square$

## 689 C Background on Strong Data Processing Inequality

690 For a Markov chain  $U \rightarrow X \rightarrow Y$ , the well-known data-processing inequality [18] states that  
 691  $I(U; Y) \leq I(U; X)$ . It turns out that this inequality can often be tightened in the form of

$$I(U; Y) \leq \eta I(U; X) \quad (48)$$

692 for some  $\eta < 1$ . Such an inequality is referred to as a strong data-processing inequality (SDPI).  
 693 Note the coefficient  $\eta$  fundamentally depends on the contraction property of the stochastic kernel  
 694  $P_{Y|X}$ , characterizing the extent by which the kernel brings two different distributions  $P_X$  and  $P_{X'}$   
 695 closer after the stochastic mapping. As the reader may refer to [57–59] for a full exposition of this  
 696 subject, here for self-containedness, we here make a modest revision of the settings in [57–59]  
 697 and develop slightly finer results concerning the contraction properties of  $P_{Y|X}$ . Specifically, the  
 698 contraction coefficient  $\eta$  in our setting will not only depend on the kernel  $P_{Y|X}$ , it will also depend  
 699 on the “effective input space” which the kernel acts upon.

700 To that end, we will denote by  $\mathcal{U}$ ,  $\mathcal{X}$ , and  $\mathcal{Y}$  the spaces in which  $U$ ,  $X$ ,  $Y$  take values, respectively.  
 701 For any distribution  $P$  on  $\mathcal{X}$ , we will use  $P_{Y|X} \circ P$  to denote the distribution on  $\mathcal{Y}$  induced by the  
 702 push-forward of the distribution  $P$  by  $P_{Y|X}$ , namely, for any  $y \in \mathcal{Y}$ ,

$$(P_{Y|X} \circ P)(y) \triangleq \int P_{Y|X}(y|x) P(x) dx$$

703 For the Markov chain  $U \rightarrow X \rightarrow Y$ , we will denote by  $\Omega(U)$  the support of the distribution  $P_U$ .  
 704 That is,  $\mathcal{S}(U)$  is the subset of  $\mathcal{U}$  on which  $P_U$  is strictly positive. Let  $\mathcal{H}(U, P_{X|U})$  be the convex  
 705 hull of  $\{P_{X|U=u} : u \in \mathcal{S}(U)\}$ , namely,  $\mathcal{H}(U, P_{X|U})$  contains all distributions on  $\mathcal{X}$  which can be  
 706 expressed as  $P_{X|U} \circ P$  for some distribution  $P$  on  $\mathcal{U}$  whose support is a subset (not necessarily  
 707 proper) of  $\mathcal{S}(U)$ . It is apparent that  $P_X \in \mathcal{H}(U, P_{X|U})$ .

708 Given the Markov chain,  $U \rightarrow X \rightarrow Y$ , we now define the contraction coefficient  $\eta$  as

$$\eta(U \rightarrow X \rightarrow Y) \triangleq \sup_{P, Q \in \mathcal{H}(U, P_{X|U})} \frac{D_{\text{KL}}(P_{Y|X} \circ P \| P_{Y|X} \circ Q)}{D_{\text{KL}}(P \| Q)} \quad (49)$$

where  $D_{\text{KL}}$  denotes the KL divergence. We note that this definition of the contraction coefficient differs from the standard definition [57–59] in that the supremization in the latter is over all  $P, Q$  which are distributions on  $\mathcal{X}$ , making the contraction coefficient only depends on  $P_{Y|X}$ . In our definition (49), the coefficient  $\eta$  also depends on the “effective input space” of the kernel, namely,  $\mathcal{H}(U, P_{X|U})$ .

Some standard results concerning the contraction coefficient can be easily extended to this revised definition of  $\eta$  in (49), which we state below.

**Lemma 8.** *For any Markov chain  $U \rightarrow X \rightarrow Y$ ,*

$$I(U; Y) \leq \eta(U \rightarrow X \rightarrow Y) I(U; X). \quad (50)$$

*Additionally, if  $Y = X + N$  for a Gaussian noise  $N \sim \mathcal{N}(0, \delta^2 \mathbf{I})$  independent of  $(U, X)$  then*

$$\eta(U \rightarrow X \rightarrow Y) \leq 1 - 2Q\left(\frac{\text{Diam}(\mathcal{H}(U, P_{X|U}))}{2\delta}\right) \quad (51)$$

*where  $\text{Diam}(\mathcal{H}(U, P_{X|U}))$  refers to the diameter of  $\mathcal{H}(U, P_{X|U})$ , measured under L2-distance, and  $Q$  is standard  $Q$ -function, or the complementary of Gaussian CDF.*

We note that the SDPI (50) follows easily from the definition of mutual information and that of  $\eta$ . The inequality (51) is an adaptation, to this context, of the result that the contraction coefficient is upper bounded by the *Dobrushin’s coefficient* of the kernel  $P_{Y|X}$  [21]. More details about the proof of Lemma 8 can be found in [57].

Concerning the contraction coefficients  $\eta_{i,t}$ , we note that from a purely theoretical perspective, it is rather difficult to estimate them or upper-bound them by a quantity smaller than 1. This is because of the Gaussian noise  $N_t$  injected at each step  $t$  having unbounded support. As a consequence,  $\mathcal{H}(Z_i, P_{\widehat{W}_t|V_t})$  is unbounded, making the restriction of the range of supremization to  $\mathcal{H}(Z_i, P_{\widehat{W}_t|V_t})$  useless.

## D Proofs for Section 6

In this section, we will prove Theorem 3 that is a stronger version of Theorem 2. To prove Theorem 2, we only need to let the contraction coefficient  $\eta$  be 1, which means using a weak version of the data-processing inequality.

We first apply the SDPI in Lemma 8 to auxiliary weight process and the SGD weight process.

For notational convenience, we denote

$$G_t \triangleq -\lambda_t g(W_{t-1}, B_t), \text{ and } V_t \triangleq \widetilde{W}_{t-1} + G_t. \quad (52)$$

Thus  $V_t$  and  $\widetilde{W}_t$  differ only by the noise  $N_t$ , or  $\widetilde{W}_t = V_t + N_t$ .

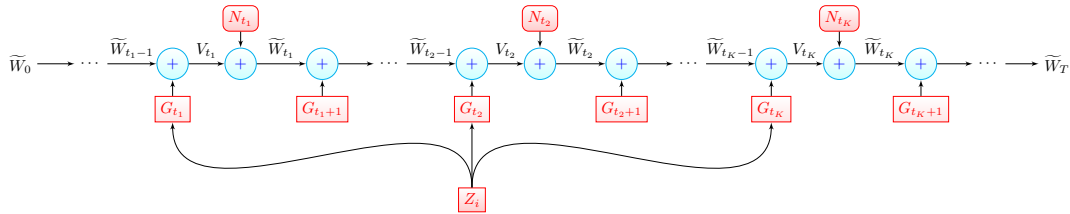

Figure 5: The relationship between  $Z_i$ ,  $\widetilde{W}_t$ ’s  $V_t$ ’s, and  $G_t$ ’s

Consider a fixed example  $Z_i$  in the training set  $S$ . Let  $\mathcal{T}_i$  denote the set of all batch indices  $t$  for which  $B_t$  contains  $Z_i$ . We will assume that  $\mathcal{T}_i$  contains  $K$  indices and consider  $\mathcal{T}_i$  as  $\{t_1, t_2, \dots, t_K\}$ . The relationship between  $Z_i$ ,  $\widetilde{W}_t$ ’s,  $V_t$ ’s, and  $G_t$ ’s are shown in Figure 5. It is clear that  $Z_i \rightarrow V_t \rightarrow \widetilde{W}_t$  form a Markov chain<sup>3</sup>. Denote

$$\eta_{i,t} \triangleq \eta(Z_i \rightarrow V_t \rightarrow \widetilde{W}_t).$$

<sup>3</sup>Note that even for  $t < t_1$ , in which  $Z_i$  and  $V_t$  are independent, the Markov chain still holds, although it degenerates.



740 We have the following result.

741 **Lemma 9.** Suppose that  $I(G_t + N_t; Z_i | \widetilde{W}_{t-1}) \leq C_t$  for some positive value  $C_t$ . Then

$$I(\widetilde{W}_T; Z_i) \leq \sum_{k=1}^K C_{t_k} \prod_{\tau \in \Gamma_i^k} \eta_{i,\tau},$$

742 where  $\Gamma_i^k = \{t_k + 1, t_k + 2, \dots, T\} \setminus \mathcal{T}_i$ .

743 *Proof.* For the step  $t_K$ , which is the last time  $Z_i$  appeared in the training process, we have

$$I(\widetilde{W}_T; Z_i) \leq \eta_{i,T} I(\widetilde{W}_{t_K}; Z_i) \quad (53)$$

$$\leq \eta_{i,T} I(\widetilde{W}_{t_K-1}; Z_i) \quad (54)$$

$$\leq \left( \prod_{\tau=t_K+1}^T \eta_{i,\tau} \right) I(\widetilde{W}_{t_K}; Z_i), \quad (55)$$

744 where Eq.53 and Eq.54 is due to Eq.50 and the data processing inequality, respectively. Eq.55 is by  
745 applying these two steps recursively.

746 Notice that

$$I(\widetilde{W}_{t_K}; Z_i) = I(\widetilde{W}_{t_K-1} + G_{t_K} + N_{t_K}; Z_i) \leq I(\widetilde{W}_{t_K-1}, G_{t_K} + N_{t_K}; Z_i) \quad (56)$$

$$= I(\widetilde{W}_{t_K-1}; Z_i) + I(G_{t_K} + N_{t_K}; Z_i | \widetilde{W}_{t_K-1}) \quad (57)$$

$$\leq I(\widetilde{W}_{t_K-1}; Z_i) + C_{t_K}, \quad (58)$$

747 where Eq.56 is by  $I(f(X); Y) \leq I(X; Y)$  and Eq.57 is by the chain rule of mutual information.  
748 Combine Eq.55 and Eq.58, we have

$$I(\widetilde{W}_T; Z_i) \leq \left( \prod_{\tau=t_K+1}^T \eta_{i,\tau} \right) \left( I(\widetilde{W}_{t_K-1}; Z_i) + C_{t_K} \right). \quad (59)$$

749 Then we can apply the similar procedure, namely Eq.53-58, to  $I(\widetilde{W}_{t_K-1}; Z_i)$  and get

$$I(\widetilde{W}_{t_K-1}; Z_i) \leq \left( \prod_{\tau=t_{K-1}+1}^{t_K-1} \eta_{i,\tau} \right) \left( I(\widetilde{W}_{t_{K-1}-1}; Z_i) + C_{t_{K-1}} \right), \quad (60)$$

750 where  $t_{K-1}$  is the second-to-last time that  $Z_i$  is used in the training process. Plugging Eq.60 into  
751 Eq.59,

$$I(\widetilde{W}_T; Z_i) \leq C_{t_K} \cdot \prod_{\tau=t_K+1}^T \eta_{i,\tau} + \left( C_{t_{K-1}} + I(\widetilde{W}_{t_{K-1}-1}; Z_i) \right) \cdot \prod_{\substack{\tau=t_{K-1}+1 \\ \tau \neq t_K}}^T \eta_{i,\tau}. \quad (61)$$

752 Finally, we apply this procedure recursively and given the fact that  $I(\widetilde{W}_t; Z_i) = 0$  for  $t < t_1$ , we  
753 have

$$I(\widetilde{W}_T; Z_i) \leq \sum_{k=1}^K C_{t_k} \prod_{\tau \in \Gamma_i^k} \eta_{i,\tau}, \quad (62)$$

754 where  $\Gamma_i^k = \{t_k + 1, t_k + 2, \dots, T\} \setminus \mathcal{T}_i$ . □

### 755 D.1 Proof of Theorem 3

756 *Proof.* Let the generalization error of SGD be decomposed by

$$\text{gen}(\mu, P_{W_T|S}) = \text{gen}(\mu, P_{\widetilde{W}_T|S}) + \mathbb{E} \left[ L_\mu(W_T) - L_\mu(\widetilde{W}_T) \right] + \mathbb{E} \left[ L_S(\widetilde{W}_T) - L_S(W_T) \right]. \quad (63)$$

757 Then we use Lemma 2 to bound the first term,

$$\text{gen}(\mu, P_{\widetilde{W}_T|S}) \leq \frac{1}{n} \sum_{i=1}^n \sqrt{2R^2 I(\widetilde{W}_T; Z_i) + \mathbb{E} [L_\mu(W_T) - L_\mu(\widetilde{W}_T)] + \mathbb{E} [L_S(\widetilde{W}_T) - L_S(W_T)]}. \quad (64)$$

758 Given a specific sample path, let the step  $t$  be the last iteration that  $Z_i$  is used. Then the following  
759 Markov chain holds,

$$760 \quad Z_i \rightarrow V_t \rightarrow \widetilde{W}_t \rightarrow V_{t+1} \rightarrow \widetilde{W}_{t+1} \rightarrow \cdots \rightarrow V_T \rightarrow \widetilde{W}_T.$$

761 For mutual information  $I(\widetilde{W}_T; Z_i)$  in Eq.64, by using the strong data processing inequality and the  
762 data processing inequality, we have

$$I(\widetilde{W}_T; Z_i) \leq I(V_{t+1}; Z_i) \cdot \prod_{\tau=t+1}^T \eta_{i,\tau} \leq I(\widetilde{W}_t; Z_i) \cdot \prod_{\tau=t+1}^T \eta_{i,\tau}. \quad (65)$$

763 Further, we would like to bound the term  $I(\widetilde{W}_t; Z_i)$ . Notice that

$$I(\widetilde{W}_t; Z_i) = I(\widetilde{W}_{t-1} + G_t + N_t; Z_i) \quad (66)$$

$$\leq I(\widetilde{W}_{t-1}, G_t + N_t; Z_i) \quad (67)$$

$$= I(\widetilde{W}_{t-1}; Z_i) + I\left(-g(W_{t-1}, B_t) + \frac{1}{\lambda_t} N_t; Z_i | \widetilde{W}_{t-1}\right). \quad (68)$$

764 Thus, applying Lemma 9 and Lemma 5 (i.e., by letting  $C_t = \frac{\lambda_t^2}{\sigma_t^2 b^2} \mathbb{E}_{W_{t-1}} [\mathbb{V}(W_{t-1})]$ ), we have

$$I(\widetilde{W}_T; Z_i) \leq \sum_{t \in \mathcal{T}_i} \frac{\lambda_t^2}{\sigma_t^2 b^2} \mathbb{E}_{W_{t-1}} [\mathbb{V}(W_{t-1})] \cdot \prod_{\tau \in \Gamma_i^t} \eta_{i,\tau}, \quad (69)$$

765 where  $\mathcal{T}_i$  is the set of all indices of iterations that contains  $Z_i$ . Thus, the following bound holds,

$$|\text{gen}(\mu, P_{\widetilde{W}_T|S})| \leq \frac{R}{nb} \sum_{i=1}^n \sqrt{\sum_{t \in \mathcal{T}_i} \frac{2\lambda_t^2}{\sigma_t^2} \mathbb{E}_{W_{t-1}} [\mathbb{V}(W_{t-1})] \cdot \prod_{\tau \in \Gamma_i^t} \eta_{i,\tau} + \left| \mathbb{E}_{W_T, S, S'} [\gamma(W_T, S) - \gamma(W_T, S')] \right|}, \quad (70)$$

766 which concludes the proof.  $\square$

## 767 **E Potential Negative Societal Impacts**

768 In this paper, we derived information-theoretic generalization bounds for SGD and proposed a  
769 regularization scheme. Our work is a foundational research and we aim to understand a fundamental  
770 problem of deep learning, that is, the generalization ability of SGD. Although our work does not have  
771 direct negative societal impacts, it's possible to design new algorithms based on the discussion in  
772 this paper, which could be tied to any particular application. In this case, our work may have some  
773 unexpected negative societal impacts. For example, if these new algorithms were abused by high-tech  
774 companies, people's privacy would be easily violated.
